# Supplementary material for: Optimization of O2 evolution electrocatalytic activity via engineered one-pot synthesized ZnSe/CoSe2@N-doped C composite
Source: Royal Society of Chemistry journal article supplement (doi:10.1039/d4nj03104k), 2024-01-01
Supplement: d4nj03104k1.pdf [file d4nj03104k1.pdf]

## Supplementary information

### **Optimization of O<sub>2</sub> Evolution Electrocatalytic Activity via Engineered One-Pot Synthesized ZnSe/CoSe<sub>2</sub>@N-Doped C Composite**

*Hyeonwook Son, Jinhyuk Baek, Shrine Maria Nithya Jeghan, Moonsu Kim<sup>1,\*</sup>, and Gibaek Lee<sup>1\*</sup>*

Advanced Energy Materials Design Lab., School of Chemical Engineering, Yeungnam University,  
38541 Gyeongsan, Republic of Korea

#### **\*Corresponding authors**

To whom correspondence should be addressed.

E-mail addresses: moonsu.kim@yu.ac.kr (Dr. Moonsu Kim); gibaek@ynu.ac.kr (Prof. Gibaek Lee)

Tel.: +82-53-810-2527

Fax: +82-53-810-4631

## Experimental

### Material Preparation

**Synthesis of Zn/Co–ZIF:** First, a mixture of 6 mmol of metal precursors ( $\text{Zn}(\text{NO}_3)_2 \cdot 6\text{H}_2\text{O}$  and  $\text{Co}(\text{NO}_3)_2 \cdot 6\text{H}_2\text{O}$ ) was dissolved in 30 mL of methanol to obtain Solution A. Subsequently, 24 mmol of 2-methylimidazole in methanol, referred to as Solution B, was added to Solution A under vigorous stirring for 24 h. The resultant purple powder was collected by centrifugation, washed several times with methanol, and dried at 80 °C overnight. This protocol was repeated with different Zn/Co molar ratios to obtain different Zn/Co–ZIF compositions. The Zn/Co molar ratios were adjusted to 1:1, 1:3, 1:5, and 1:7 while maintaining a total of 6 mmol of metals.

**Synthesis of ZnSe/CoSe<sub>2</sub>@NCs.** The Zn/Co–ZIF precursor was mixed with Se powder at a mass ratio of 1:2 and annealed at 600 °C for 3 h at a heating rate of 2 °C min<sup>-1</sup> in an Ar atmosphere. The final products were denoted as ZnSe/CoSe<sub>2</sub>@NC with varying Zn/Co ratios (1:1, 1:3, 1:5, and 1:7). Moreover, single-metal samples, referred to as ZnSe@NC and CoSe<sub>2</sub>@NC, were prepared for comparison.

### Characterization

The samples were characterized through field-emission scanning electron microscopy (FE-SEM; S-4800, HITACHI) and field-emission transmission electron microscopy (FE-TEM; Titan G2 ChemiSTEM Cs Probe, FEI) with energy-dispersive spectroscopy (EDS) and selected-area electron diffraction (SAED) analysis. X-ray diffraction (XRD) was performed using a micro-powder diffractometer (DIATOME) with Cu K $\alpha$  radiation. Thermogravimetric analysis (TGA) was conducted from 30 to 900 °C at a heating rate of 10 °C min<sup>-1</sup> in air. X-ray photoelectron spectroscopy (XPS) was performed using an Al K $\alpha$  X-ray source (K-Alpha, Thermo Scientific).

### Electrochemical Measurements

The electrochemical properties were assessed using an Autolab potentiostat/galvanostat (PGSTAT 302N) in a three-electrode setup with a C rod and Hg/HgO electrodes as the counter and reference electrodes, respectively. The catalyst ink was created by mixing 5 mg catalyst with 240  $\mu\text{L}$  isopropyl alcohol, 240  $\mu\text{L}$  deionized water, and 20  $\mu\text{L}$  5 wt% Nafion; sonicating for 30 min; and drop-casting onto a  $1.0 \times 1.0 \text{ cm}^2$  C cloth. Linear sweep voltammetry (LSV) was conducted in 1 M KOH at  $5 \text{ mV s}^{-1}$  (1.1 – 1.8 V), and the reversible  $\text{H}_2$  potential (RHE) was adjusted using the Nernst equation ( $E_{\text{RHE}} = E_{\text{Hg/HgO}} + 0.059 \times \text{pH} + 0.098$ ). Cyclic voltammetry (CV) was conducted at 20–100  $\text{mV s}^{-1}$  to determine the double-layer capacitance. Stability was tested via chronopotentiometry at 10 and 100  $\text{mA cm}^{-2}$ . Electrochemical impedance spectroscopy (EIS) was performed over a frequency range of 100 kHz to 1 Hz at 0.68 V (vs. Hg/HgO) with an amplitude of 10 mV.

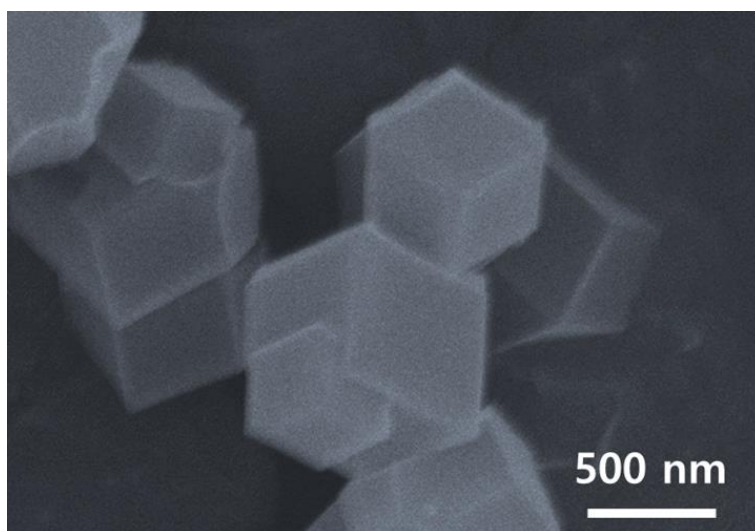

**Figure S1.** SEM image of Zn/Co-ZIF (1:5).

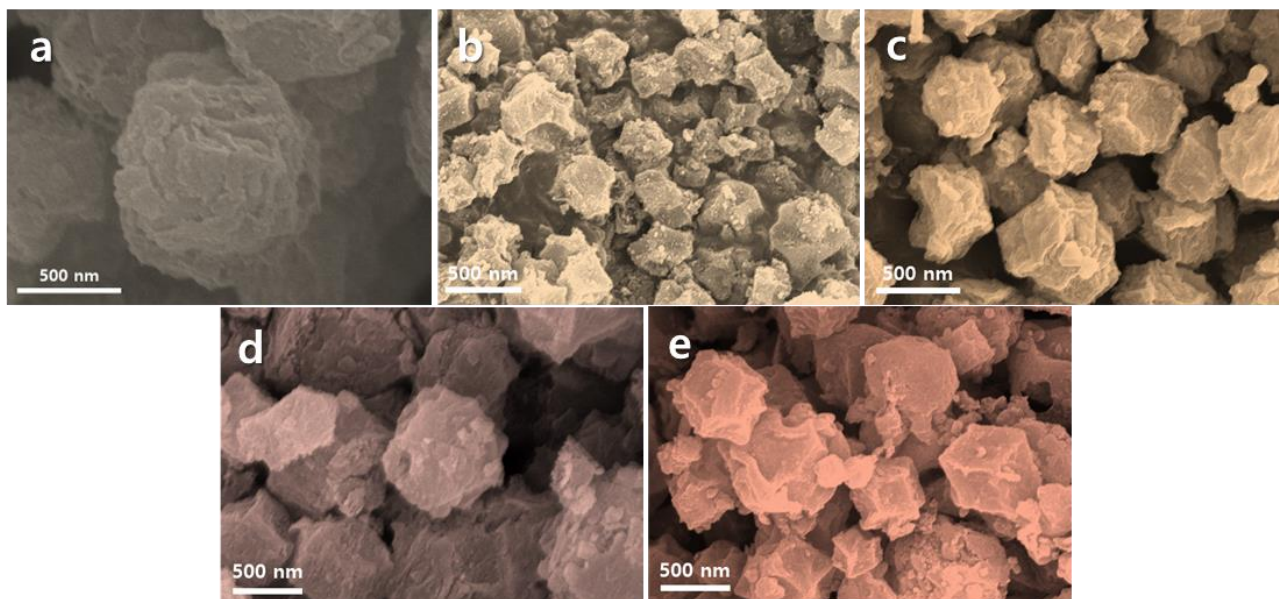

**Figure S2.** SEM images of (a) ZnSe@NC, (b–d) ZnSe/CoSe<sub>2</sub>@NC (1:1, 1:3, and 1:7), and (e) CoSe<sub>2</sub>@NC.

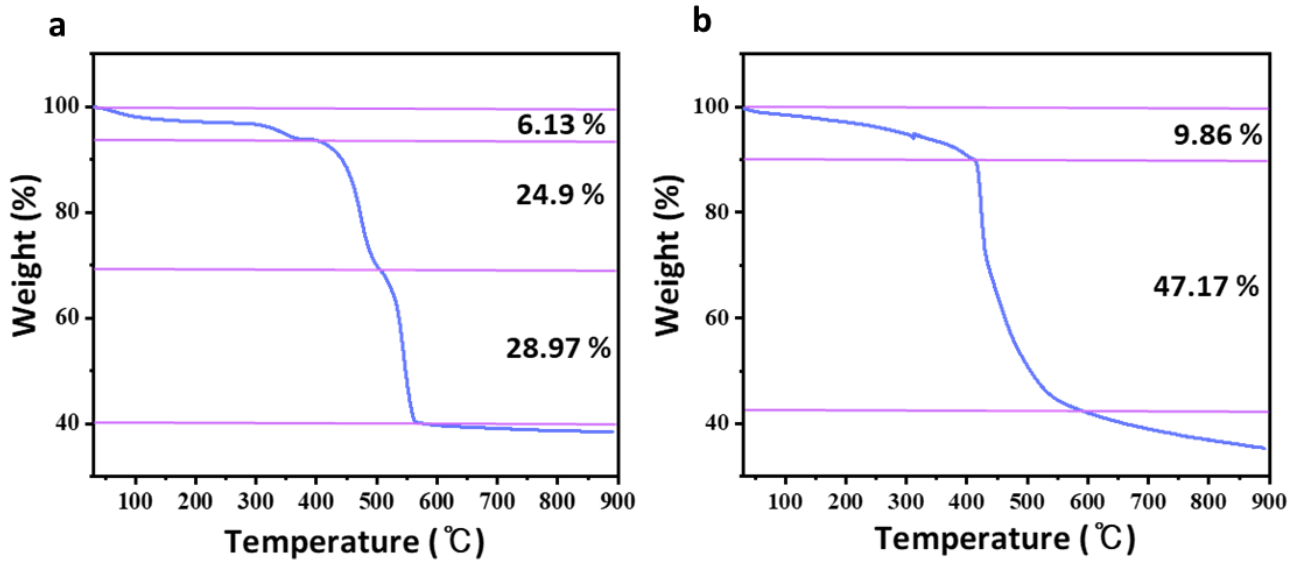

**Figure S3.** TGA profiles of (a) CoSe<sub>2</sub>@NC and (b) ZnSe@NC.

In the initial stage, from room temperature to 400 °C, a weight loss of 7.49% is noted owing to the evaporation of water molecules and formation and subsequent sublimation of SeO<sub>2</sub>, as described in Equation (1):

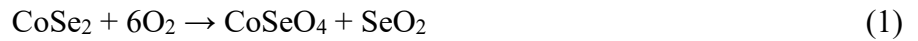

In the second stage at 400–550 °C, rapid weight loss occurs corresponding to the combustion of the N-doped C matrix, as represented by Equation (2):

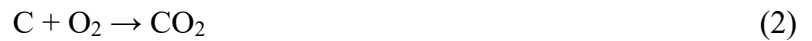

In the final stage at >550 °C, the oxidation of Zn and Co occurs, as depicted in Equations (3) and (4), respectively:

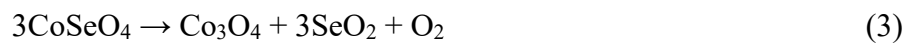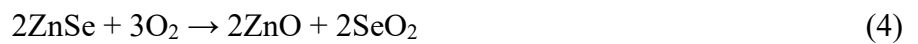

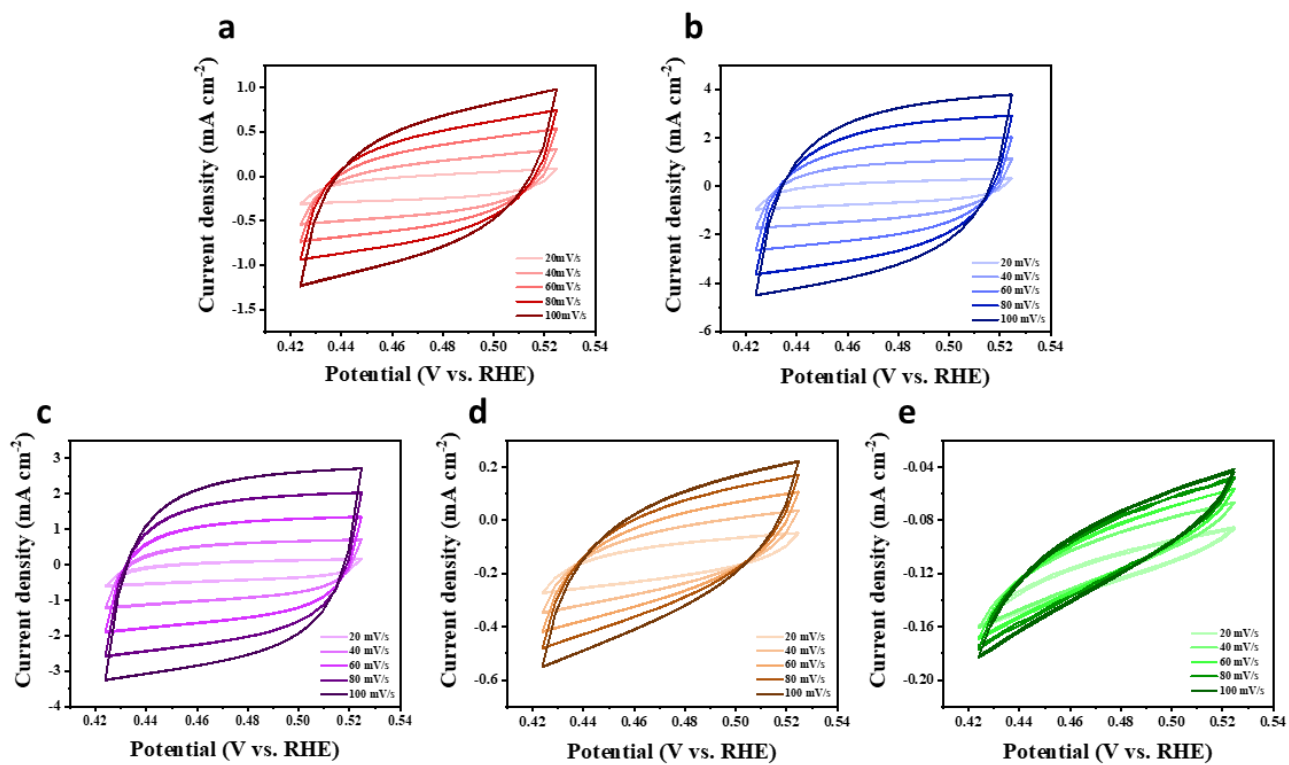

**Figure S4.** CV profiles of (a–d) ZnSe/CoSe<sub>2</sub>@NC (1:1, 1:3, 1:5, and 1:7) and (e) CoSe<sub>2</sub>@NC at different scan rates of 20–100 mV s<sup>-1</sup>.

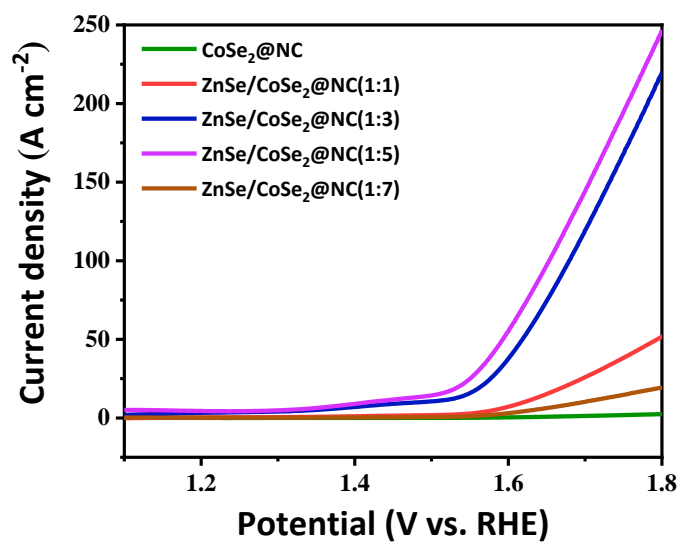

**Figure S5.** LSV curves representing electrocatalytic OER performance ZnSe@CoSe<sub>2</sub>/NC (1:0, 1:1, 1:3, 1:5, 1:7, and 0:1) normalized by the ECSA.



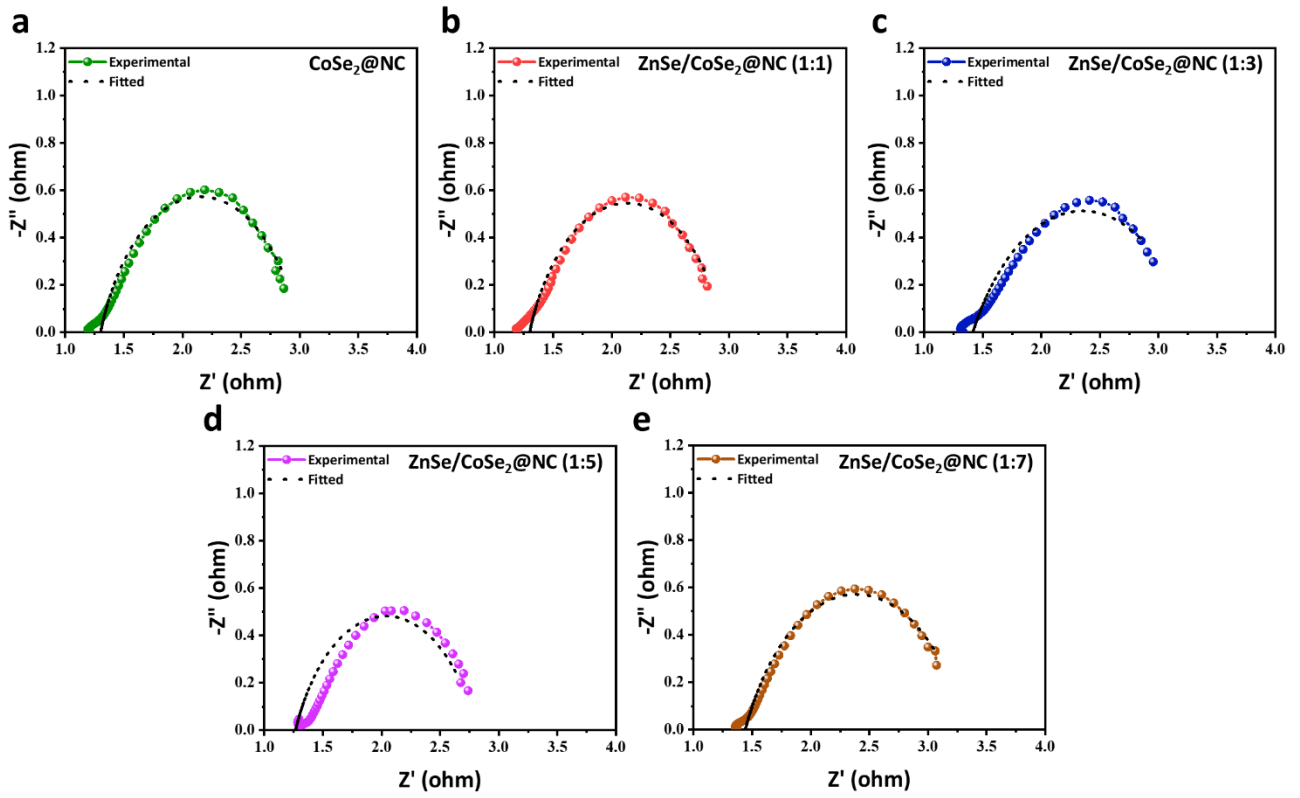

**Figure S6.** Comparing actual with fitted Nyquist plot of the samples. (a)  $\text{CoSe}_2@NC$ ,  $\text{ZnSe}/\text{CoSe}_2@NC$  (b) 1:1, (c) 1:3, (d) 1:5, and (e) 1:7.

**Table S1.** Comparing the electrolyte resistance ( $R_s$ ) and charge transfer resistance ( $R_{ct}$ ) of the samples.

|                                       | <b>Electrolyte resistance<br/>(<math>R_s</math>)</b> | <b>Charge transfer resistance<br/>(<math>R_{ct}</math>)</b> |
|---------------------------------------|------------------------------------------------------|-------------------------------------------------------------|
| <b>CoSe<sub>2</sub>@NC</b>            | 1.265                                                | 1.664                                                       |
| <b>ZnSe/CoSe<sub>2</sub>@NC (1:1)</b> | 1.3                                                  | 1.709                                                       |
| <b>ZnSe/CoSe<sub>2</sub>@NC (1:3)</b> | 1.414                                                | 1.874                                                       |
| <b>ZnSe/CoSe<sub>2</sub>@NC (1:5)</b> | 1.299                                                | 1.547                                                       |
| <b>ZnSe/CoSe<sub>2</sub>@NC (1:7)</b> | 1.441                                                | 1.890                                                       |

**Table S2.** Comparing the concentration of Se in the electrolyte before and after 48 h stability test.

|                                                                     | <b>Se concentration (ppm)</b> |
|---------------------------------------------------------------------|-------------------------------|
| <b>Fresh electrolyte (1 M KOH)</b>                                  | 0                             |
| <b>Spent electrolyte<br/>(after 48 h at 100 mA cm<sup>-2</sup>)</b> | 4.558                         |
